# Supplementary material for: Eisenia arborea (Areschoung) domestication and mariculture development on the Pacific coast of Baja California, México
Source: Frontiers journal article supplement (doi:10.3389/fmars.2022.932534), 2022-08-24
Supplement: Data_Sheet_1.PDF [file Data_Sheet_1.PDF]

## *Supplementary material*

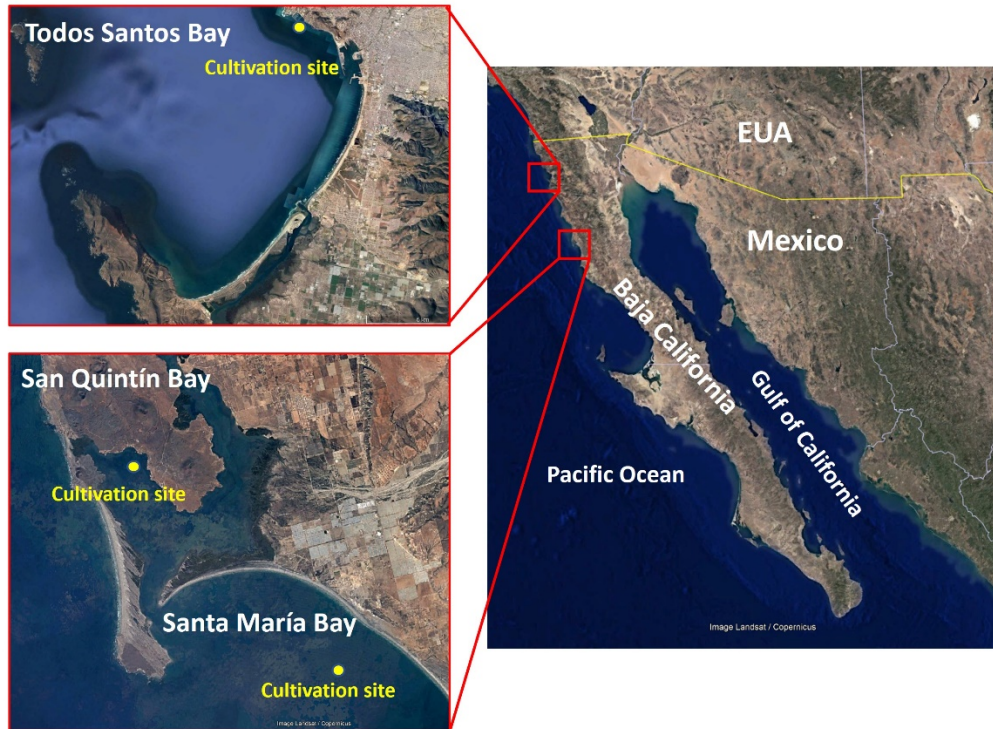

**Supplementary Figure 1.** Geographic location of the experimental cultivation sites, in Todos Santos Bay ( $31^{\circ} 51' 42.57''$  N,  $116^{\circ} 39' 31.58''$  W), San Quintín Bay ( $30^{\circ} 26' 35.20''$  N,  $115^{\circ} 59' 52.43''$  W) and Santa María Bay ( $30^{\circ} 21' 43.68''$  N,  $115^{\circ} 55' 8.90''$  W). Images have been modified from Google Earth.

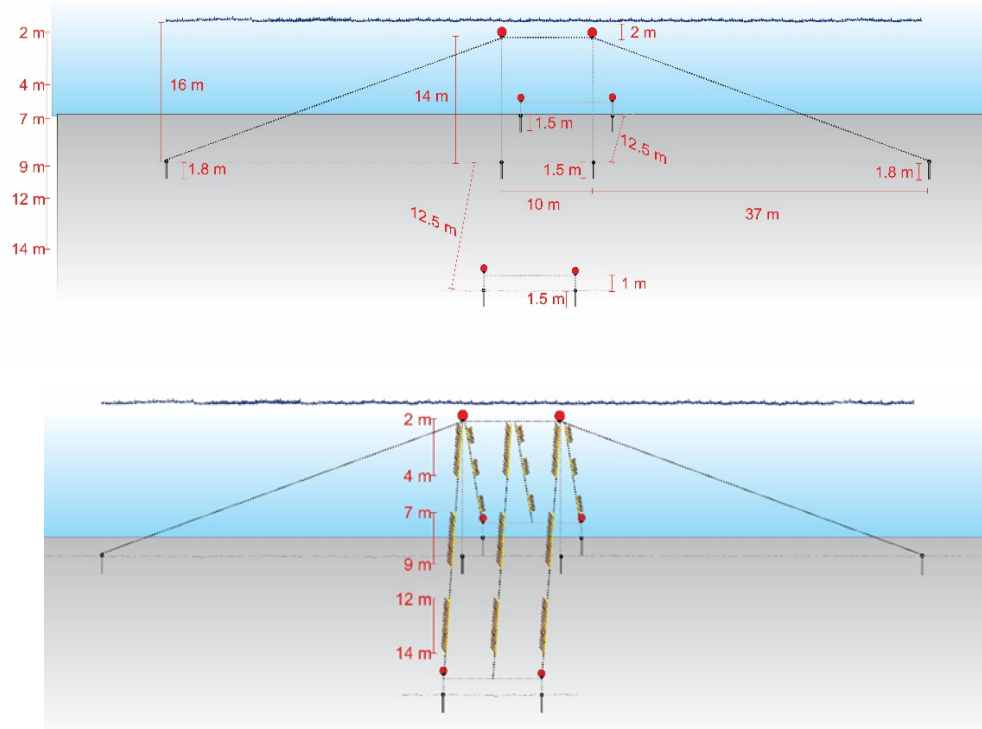

**Supplementary Figure 2.** Design for *Eisenia arborea* mariculture. Floating primary and secondary ropes were installed at the different experimental depth ranges (2-4, 7-9, 12-14 m). The structures were anchored to the sandy substratum by stainless-steel tubes.

**Supplementary Table 1.** One-way analysis of variance applied on biological descriptors measured in harvested and unharvested *E. arborea* sporophytes during *in situ* experimental culture (Fig. 2). Cultures were made in San Quintín Bay and Todos Santos Bay.

**San Quintín Bay**

**Total weight**

| Source of Variation | DF  | SS           | MS          | F      | P      |
|---------------------|-----|--------------|-------------|--------|--------|
| Between Groups      | 11  | 28625044.739 | 2602276.794 | 36.168 | <0.001 |
| Residual            | 348 | 25038472.594 | 71949.634   |        |        |
| Total               | 359 | 53663517.333 |             |        |        |

**Specific growth**

| Source of Variation | DF  | SS       | MS     | F      | P      |
|---------------------|-----|----------|--------|--------|--------|
| Between Groups      | 11  | 583.293  | 53.027 | 20.206 | <0.001 |
| Residual            | 348 | 913.251  | 2.624  |        |        |
| Total               | 359 | 1496.544 |        |        |        |

**Todos Santos Bay**

**Total weight**

| Source of Variation | DF  | SS           | MS         | F      | P      |
|---------------------|-----|--------------|------------|--------|--------|
| Between Groups      | 11  | 10165716.352 | 924156.032 | 53.555 | <0.001 |
| Residual            | 348 | 6005138.532  | 17256.145  |        |        |
| Total               | 359 | 16170854.883 |            |        |        |

**Specific growth**

| Source of Variation | DF  | SS      | MS     | F      | P      |
|---------------------|-----|---------|--------|--------|--------|
| Between Groups      | 10  | 454.935 | 45.494 | 50.474 | <0.001 |
| Residual            | 319 | 287.520 | 0.901  |        |        |
| Total               | 329 | 742.456 |        |        |        |

**Supplementary Table 2.** One-way analysis of variance applied on biological descriptors measured in harvested and unharvested *E. arborea* sporophytes during *in situ* experimental culture (Fig. 3). Cultures were made in San Quintín Bay and Todos Santos Bay.

**San Quintín Bay**

**Total weight (harvested sporophytes)**

| Source of Variation | DF  | SS       | MS      | F      | P      |
|---------------------|-----|----------|---------|--------|--------|
| Between Groups      | 10  | 10018816 | 1001882 | 28.369 | <0.001 |
| Residual            | 154 | 5438664  | 35316   |        |        |
| Total               | 164 | 15457480 |         |        |        |

**Total weight (unharvested sporophytes)**

| Source of Variation | DF  | SS       | MS       | F      | P      |
|---------------------|-----|----------|----------|--------|--------|
| Between Groups      | 10  | 11147447 | 1114745  | 19.816 | <0.001 |
| Residual            | 154 | 8663046  | 56253.55 |        |        |
| Total               | 164 | 19810494 |          |        |        |

**Specific growth (harvested sporophytes)**

| Source of Variation | DF  | SS      | MS     | F     | P      |
|---------------------|-----|---------|--------|-------|--------|
| Between Groups      | 10  | 134.114 | 13.411 | 9.567 | <0.001 |
| Residual            | 154 | 215.879 | 1.402  |       |        |
| Total               | 164 | 349.994 |        |       |        |

**Specific growth (unharvested sporophytes)**

| Source of Variation | DF  | SS      | MS    | F     | P      |
|---------------------|-----|---------|-------|-------|--------|
| Between Groups      | 10  | 59.568  | 5.957 | 3.985 | <0.001 |
| Residual            | 154 | 230.221 | 1.495 |       |        |
| Total               | 164 | 289.79  |       |       |        |

**Todos Santos Bay**

**Total weight (harvested sporophytes)**

| Source of Variation | DF  | SS       | MS       | F       | P      |
|---------------------|-----|----------|----------|---------|--------|
| Between Groups      | 10  | 3744758  | 374475.8 | 178.777 | <0.001 |
| Residual            | 154 | 322576.2 | 2094.65  |         |        |
| Total               | 164 | 4067334  |          |         |        |

**Total weight (unharvested sporophytes)**

| Source of Variation | DF  | SS      | MS       | F      | P      |
|---------------------|-----|---------|----------|--------|--------|
| Between Groups      | 10  | 7769054 | 776905.4 | 85.315 | <0.001 |
| Residual            | 154 | 1402368 | 9106.289 |        |        |
| Total               | 164 | 9171422 |          |        |        |

**Specific growth (harvested sporophytes)**

| Source of Variation | DF | SS | MS | F | P |
|---------------------|----|----|----|---|---|
|---------------------|----|----|----|---|---|

|                |     |        |        |       |       |
|----------------|-----|--------|--------|-------|-------|
| Between Groups | 10  | 0.602  | 0.0602 | 0.527 | 0.869 |
| Residual       | 154 | 17.568 | 0.114  |       |       |
| Total          | 164 | 18.17  |        |       |       |

**Specific growth (unharvested sporophytes)**

| Source of Variation | DF  | SS      | MS    | F      | P      |
|---------------------|-----|---------|-------|--------|--------|
| Between Groups      | 10  | 93.193  | 9.319 | 23.222 | <0.001 |
| Residual            | 154 | 61.801  | 0.401 |        |        |
| Total               | 164 | 154.994 |       |        |        |

**Supplementary Table 3.** One-way analysis of variance applied to test the effect of 'depth' in the biological descriptors of cultivated *E. arborea* (Fig. 5) in each destructive sampling time (July and November 2016).

**Culture Biomass July**

| Source of Variation | DF | SS      | MS     | F     | P     |
|---------------------|----|---------|--------|-------|-------|
| Between Groups      | 2  | 86.842  | 43.421 | 3.141 | 0.051 |
| Residual            | 57 | 788.032 | 13.825 |       |       |
| Total               | 59 | 874.874 |        |       |       |

**Culture Biomass November**

| Source of Variation | DF | SS      | MS    | F     | P     |
|---------------------|----|---------|-------|-------|-------|
| Between Groups      | 2  | 18.092  | 9.046 | 3.555 | 0.035 |
| Residual            | 57 | 145.06  | 2.545 |       |       |
| Total               | 59 | 163.152 |       |       |       |

**Culture density July**

| Source of Variation | DF | SS       | MS       | F     | P     |
|---------------------|----|----------|----------|-------|-------|
| Between Groups      | 2  | 15307.5  | 7653.75  | 5.352 | 0.007 |
| Residual            | 57 | 81510.18 | 1430.003 |       |       |
| Total               | 59 | 96817.68 |          |       |       |

**Culture density November**

| Source of Variation | DF | SS       | MS      | F     | P     |
|---------------------|----|----------|---------|-------|-------|
| Between Groups      | 2  | 1703.333 | 851.667 | 0.539 | 0.586 |
| Residual            | 57 | 89988.75 | 1578.75 |       |       |
| Total               | 59 | 91692.08 |         |       |       |

**% of epibionts**

| Source of Variation | DF | SS       | MS       | F      | P      |
|---------------------|----|----------|----------|--------|--------|
| Between Groups      | 2  | 7210.009 | 3605.004 | 12.283 | <0.001 |
| Residual            | 29 | 8511.501 | 293.5    |        |        |
| Total               | 31 | 15721.51 |          |        |        |

**Sporophyte weight July**

| Source of Variation | DF | SS | MS | F | P |
|---------------------|----|----|----|---|---|
|---------------------|----|----|----|---|---|

|                                   |     |          |          |        |        |
|-----------------------------------|-----|----------|----------|--------|--------|
| Between Groups                    | 2   | 44242.08 | 22121.04 | 23.425 | <0.001 |
| Residual                          | 172 | 162422.4 | 944.316  |        |        |
| Total                             | 174 | 206664.5 |          |        |        |
| <b>Sporophyte weight November</b> |     |          |          |        |        |
| Source of Variation               | DF  | SS       | MS       | F      | P      |
| Between Groups                    | 2   | 8495.721 | 4247.86  | 6.688  | 0.002  |
| Residual                          | 106 | 67329.87 | 635.187  |        |        |
| Total                             | 108 | 75825.59 |          |        |        |
| <b>Blade lenght July</b>          |     |          |          |        |        |
| Source of Variation               | DF  | SS       | MS       | F      | P      |
| Between Groups                    | 2   | 3102.227 | 1551.113 | 10.57  | <0.001 |
| Residual                          | 172 | 25241.18 | 146.751  |        |        |
| Total                             | 174 | 28343.41 |          |        |        |
| <b>Blade lenght November</b>      |     |          |          |        |        |
| Source of Variation               | DF  | SS       | MS       | F      | P      |
| Between Groups                    | 2   | 2985.834 | 1492.917 | 16.068 | <0.001 |
| Residual                          | 71  | 6596.72  | 92.912   |        |        |
| Total                             | 73  | 9582.554 |          |        |        |
| <b>Stipe lenght July</b>          |     |          |          |        |        |
| Source of Variation               | DF  | SS       | MS       | F      | P      |
| Between Groups                    | 2   | 72.536   | 36.268   | 12.806 | <0.001 |
| Residual                          | 172 | 487.117  | 2.832    |        |        |
| Total                             | 174 | 559.653  |          |        |        |
| <b>Stipe lenght November</b>      |     |          |          |        |        |
| Source of Variation               | DF  | SS       | MS       | F      | P      |
| Between Groups                    | 2   | 10.795   | 5.398    | 4.586  | 0.013  |
| Residual                          | 71  | 83.57    | 1.177    |        |        |
| Total                             | 73  | 94.365   |          |        |        |
